# Supplementary material for: Oxygen and sulfur mass-independent isotopic signatures in black crusts: the complementary negative ∆ 33 S-reservoir of sulfate aerosols?
Source: Copernicus journal article supplement (doi:10.5194/acp-2019-971), 2019-10-28
Supplement: Supplementary file 1 [file acp-2019-971-supplement.pdf]

## Supplement

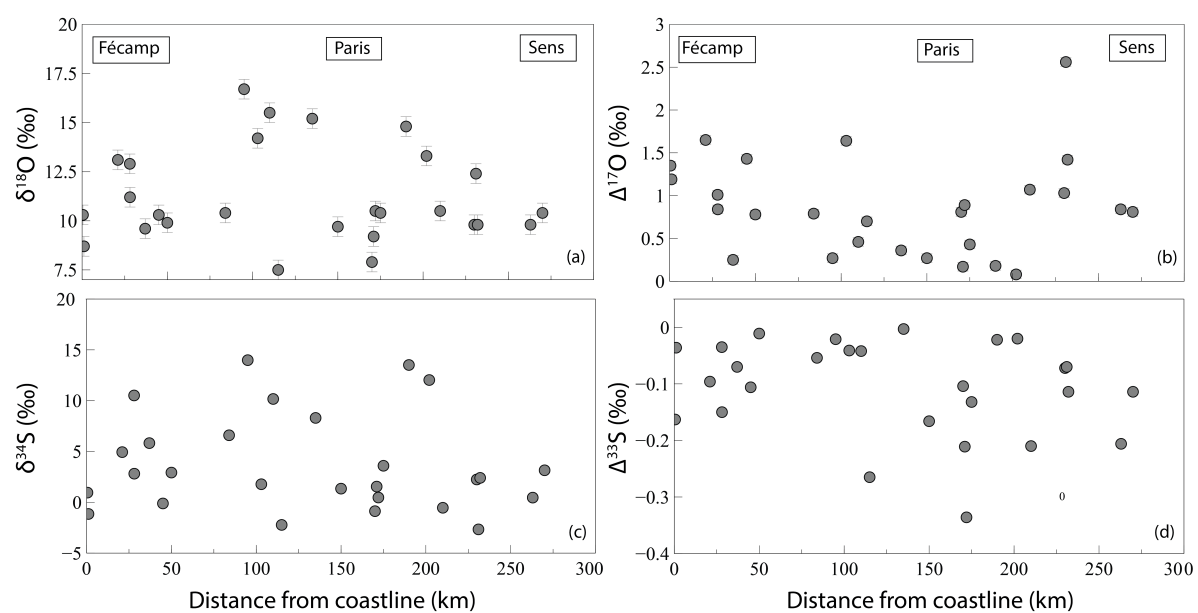

**Fig. 1 supplementary** Evolution of (a)  $\delta^{18}\text{O}$ , (b)  $\Delta^{17}\text{O}$  and (c)  $\delta^{34}\text{S}$  in function of the distance from coastline. No correlation between oxygen and sulfur isotopic compositions and the distance from the coastline are observed.

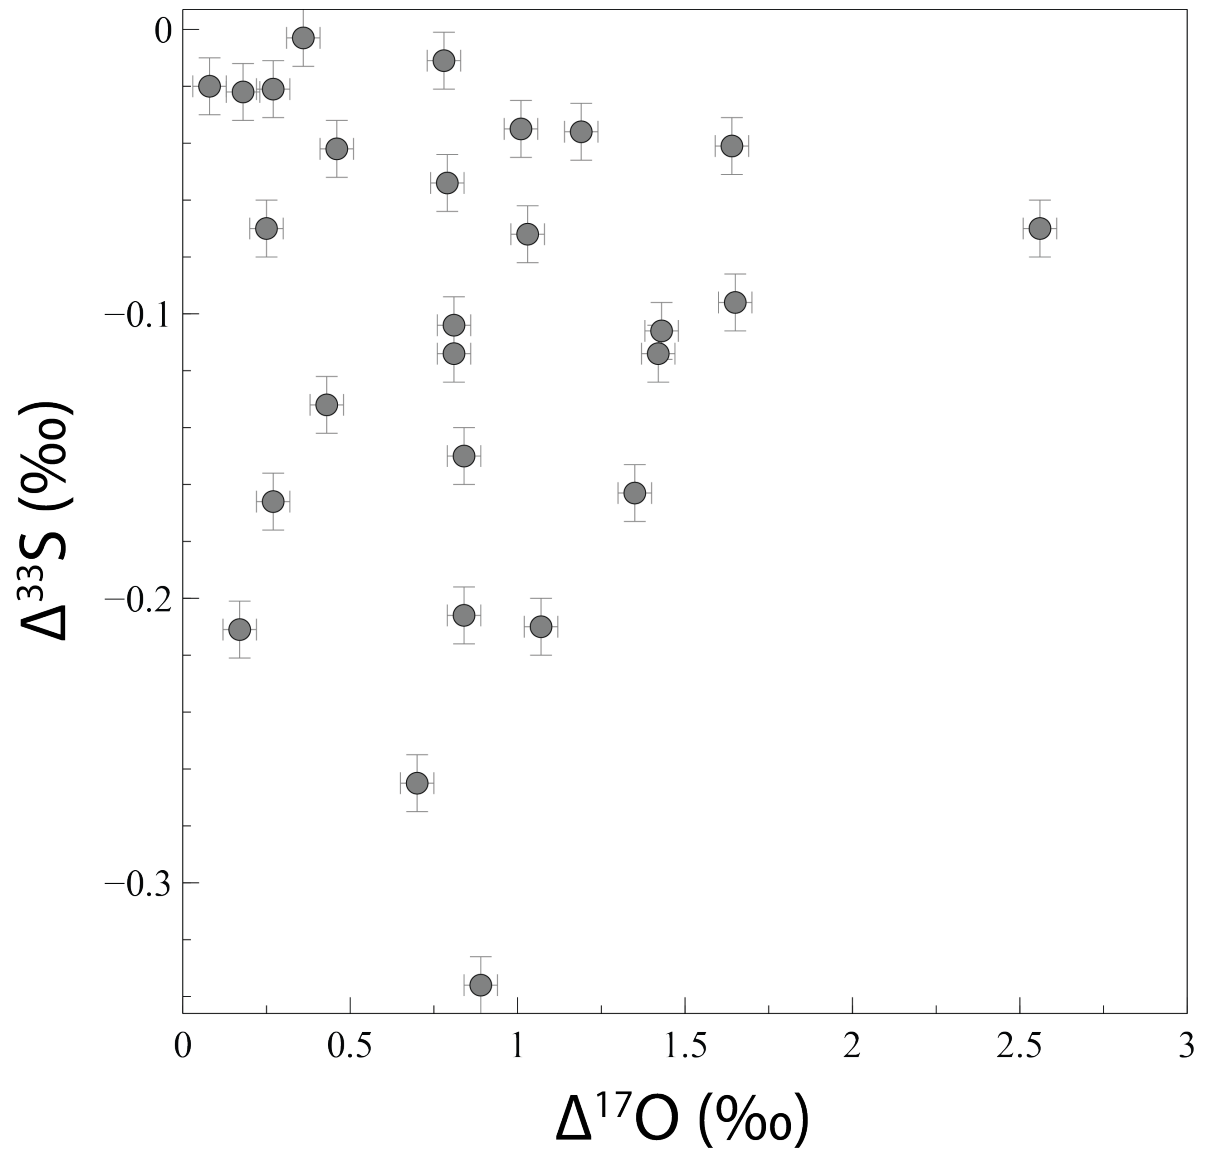

**Fig. 2 supplementary** Evolution of  $\Delta^{33}\text{S}$  with  $\Delta^{17}\text{O}$ -values.
